# Supplementary material
Source: PubMed Central journal article supplement (PMC2154459)

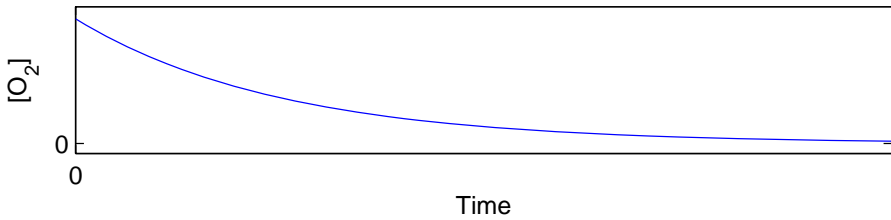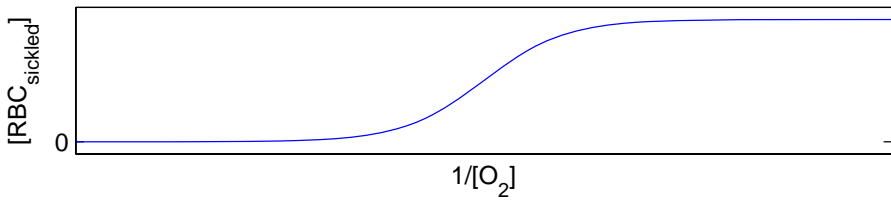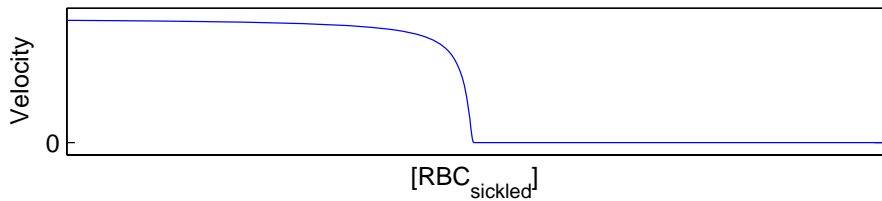

Supplement: supp_0707122105_07122Fig5.pdf [file supp_0707122105_07122Fig5.pdf]

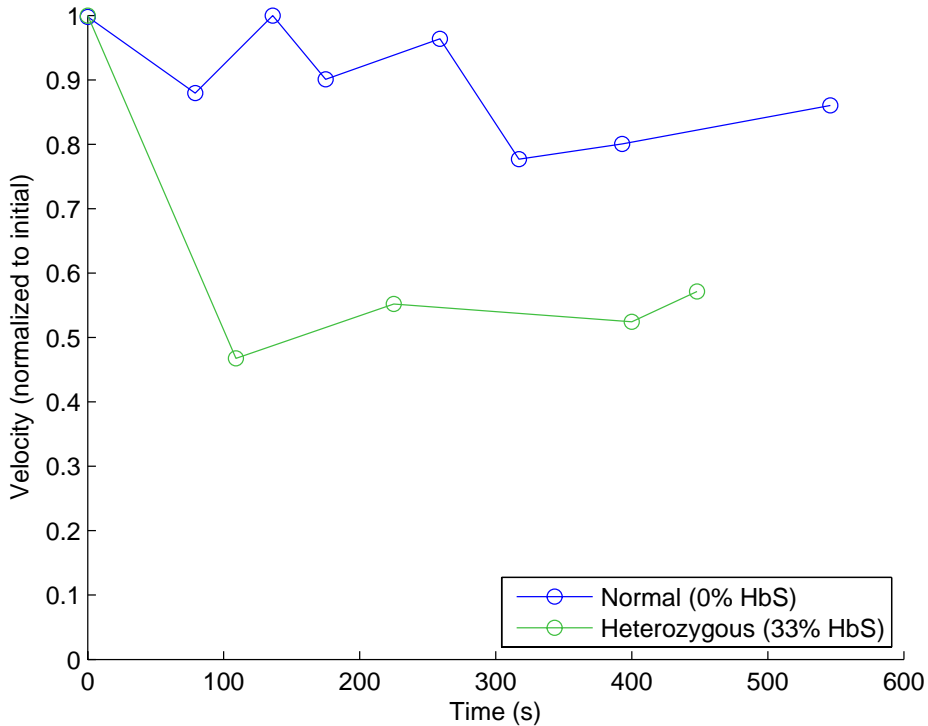

Supplement: supp_0707122105_07122Fig6.pdf [file supp_0707122105_07122Fig6.pdf]

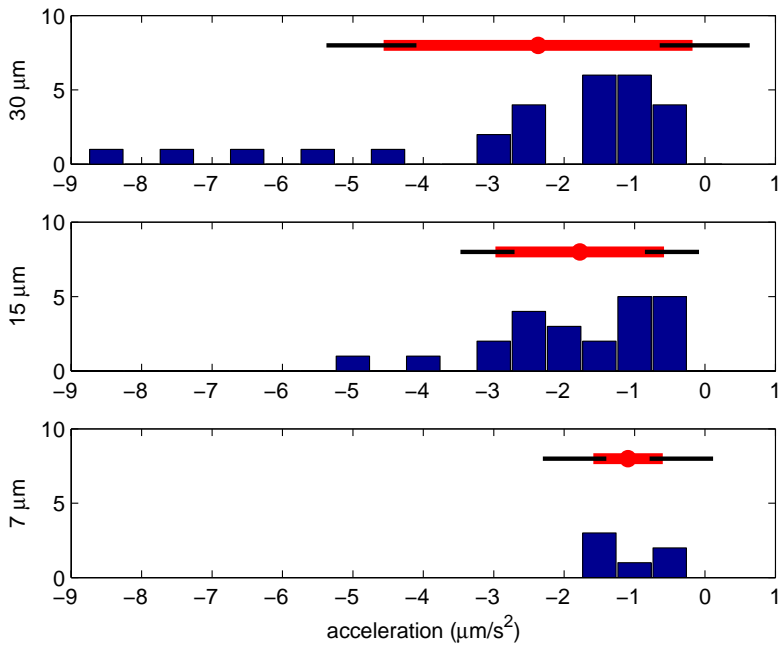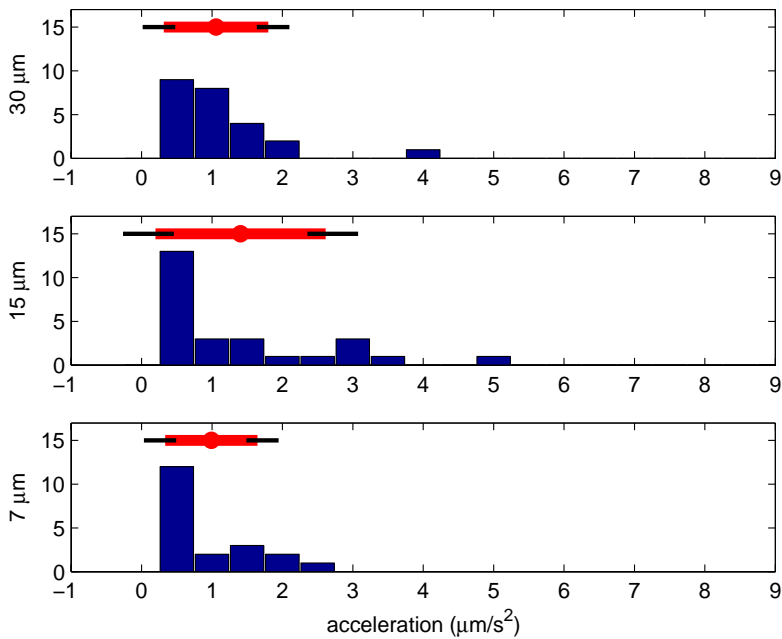

Supplement: supp_0707122105_07122Fig7.pdf [file supp_0707122105_07122Fig7.pdf]

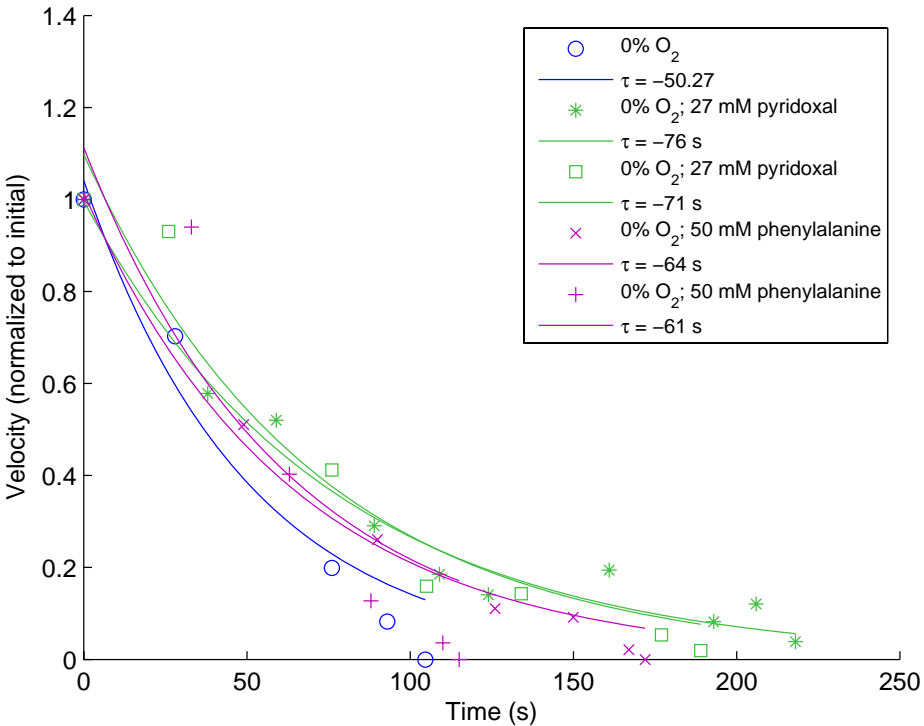

Supplement: supp_0707122105_07122Fig8.pdf [file supp_0707122105_07122Fig8.pdf]

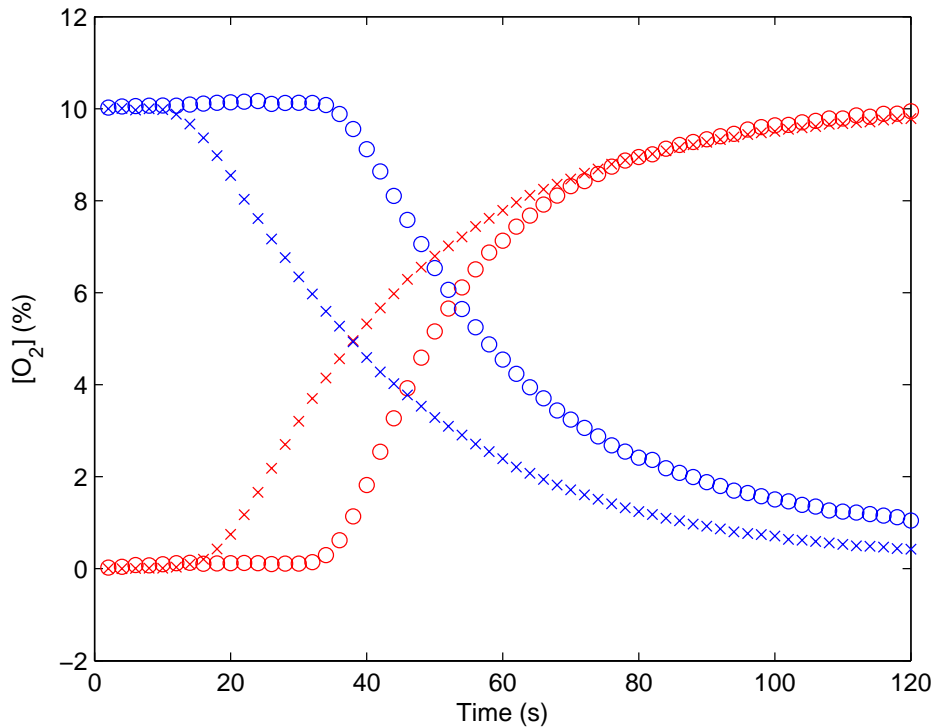

Supplement: supp_0707122105_07122Fig9.pdf [file supp_0707122105_07122Fig9.pdf]
